# Supplementary material for: Development and Validation of the Test of Orthorexia Nervosa (TON-17)
Source: MDPI journal article supplement (doi:10.3390/jcm10081637), 2021-04-12
Supplement: s1 [file s1]

# TON-17

Rogowska, Kwaśnicka, & Ochnik, 2021

Poniżej znajdują się twierdzenia, które służą do samodzielnego opisanie swojego stanu, odczuć i zachowań. Proszę dokładnie przeczytać każde stwierdzenie, a następnie zaznaczyć kółkiem odpowiedź, która najlepiej odwzorowuje Pana/Pani odczucia i zachowania, zgodnie ze skalą 1-5, gdzie:

| 1 = Zdecydowanie nie zgadzam się<br>2 = Raczej nie zgadzam się<br>3 = Nie mam zdania<br>4 = Raczej zgadzam się<br>5 = Zdecydowanie zgadzam się |                                                                                                                                             | Zdecydowanie nie zgadzam się | Nie zgadzam się | Nie mam zdania | Zgadzam się | Zdecydowanie zgadzam się |
|------------------------------------------------------------------------------------------------------------------------------------------------|---------------------------------------------------------------------------------------------------------------------------------------------|------------------------------|-----------------|----------------|-------------|--------------------------|
| 1.                                                                                                                                             | Niepokoi mnie zbyt duża dostępność niezdrowego jedzenia.                                                                                    | 1                            | 2               | 3              | 4           | 5                        |
| 2.                                                                                                                                             | Nie ufam żywności przygotowanej przez kogoś innego.                                                                                         | 1                            | 2               | 3              | 4           | 5                        |
| 3.                                                                                                                                             | Zanim coś zjem, upewniam się, czy dany produkt posiada odpowiednie certyfikaty jakości zdrowej żywności.                                    | 1                            | 2               | 3              | 4           | 5                        |
| 4.                                                                                                                                             | Nie jadam żywności GMO.                                                                                                                     | 1                            | 2               | 3              | 4           | 5                        |
| 5.                                                                                                                                             | Nie akceptuję w swojej diecie żywności wyprodukowanej przy pomocy pestycydów.                                                               | 1                            | 2               | 3              | 4           | 5                        |
| 6.                                                                                                                                             | Często podejmuję rozmowy na temat zdrowej żywności, żeby przekonać innych do zmiany sposobu odżywiania.                                     | 1                            | 2               | 3              | 4           | 5                        |
| 7.                                                                                                                                             | Zwracam dużą uwagę na skład kupowanej żywności.                                                                                             | 1                            | 2               | 3              | 4           | 5                        |
| 8.                                                                                                                                             | Szczegółowo planuję każdy posiłek.                                                                                                          | 1                            | 2               | 3              | 4           | 5                        |
| 9.                                                                                                                                             | Osoby spożywające śmieciową żywność narażają swoje życie.                                                                                   | 1                            | 2               | 3              | 4           | 5                        |
| 10.                                                                                                                                            | Zdrowie jest dla mnie najważniejsze.                                                                                                        | 1                            | 2               | 3              | 4           | 5                        |
| 11.                                                                                                                                            | Spożywanie zdrowego jedzenia znacząco wpływa na jakość mojego życia.                                                                        | 1                            | 2               | 3              | 4           | 5                        |
| 12.                                                                                                                                            | Mój sposób żywienia powoduje, że czuję się samotny/samotna.                                                                                 | 1                            | 2               | 3              | 4           | 5                        |
| 13.                                                                                                                                            | W związku z aktualnym sposobem odżywiania, mój stan zdrowia pogorszył się.                                                                  | 1                            | 2               | 3              | 4           | 5                        |
| 14.                                                                                                                                            | Moi bliscy, lekarze lub inni pracownicy opieki zdrowotnej byli zaniepokojeni moim stanem zdrowia i sugerowali mi zmianę sposobu odżywiania. | 1                            | 2               | 3              | 4           | 5                        |
| 15.                                                                                                                                            | Zepchnąłem/zepchnęłam swoje hobby i zainteresowania na drugi plan przez moje zaangażowanie w zdrowy styl życia.                             | 1                            | 2               | 3              | 4           | 5                        |
| 16.                                                                                                                                            | Wolę spożyć w samotności zdrowy posiłek niż wyjść ze znajomymi lub rodziną żeby zjeść coś na mieście.                                       | 1                            | 2               | 3              | 4           | 5                        |
| 17.                                                                                                                                            | Przez większą część dnia dręczą mnie myśli o jakości spożywanego jedzenia.                                                                  | 1                            | 2               | 3              | 4           | 5                        |
| Proszę dodać do siebie zaznaczone wyniki w kolumnach =                                                                                         |                                                                                                                                             |                              |                 |                |             |                          |
