# Supplementary material for: Development and Validation of the Test of Orthorexia Nervosa (TON-17)
Source: MDPI journal article supplement (doi:10.3390/jcm10081637), 2021-04-12
Supplement: s1 [file s1]

## Supplementary Materials: Tables S1 – S8

**Table S1.** Structured interview for orthorexia research

|                                                                                                                                                            |
|------------------------------------------------------------------------------------------------------------------------------------------------------------|
| <b>Healthy lifestyle</b>                                                                                                                                   |
| 1. What does healthy lifestyle mean for you?                                                                                                               |
| 2. When did you first start to be interested in healthy food and lifestyle?                                                                                |
| 3. What made you pay more attention to what you eat (friends, authorities, family, sickness, media)?                                                       |
| 4. Did you seek information from medical professionals, dieticians, or did you search for information on healthy eating on the Internet?                   |
| 5. What diets have you tried so far? Why?                                                                                                                  |
| 6. Do you exercise? How often? What kind of exercises do you do? For how long? Does your mood depend on that? What impact does exercise have on your diet? |
| 7. Do you control your weight? To what extent does your weight determine your well-being/self-esteem?                                                      |
| 8. Do you count calories before deciding to eat? How often does this happen?                                                                               |
| 9. Have you ever restricted the amount of food you eat to a minimum to achieve a perfect figure? How long did it last?                                     |
| 10. Have you ever eaten a lot of food at once and then forced vomiting? How often? For how long?                                                           |
| <b>Family and relationships</b>                                                                                                                            |
| 1. What was the diet like in your family home?                                                                                                             |
| 2. Has anyone in your family had symptoms of diseases such as: diabetes, reflux, stomach ulcers, lactose intolerance, celiac disease, allergy?             |
| 3. Has anyone in your family ever restricted the amount of food they eat to a minimum to achieve a perfect figure? How long did it last?                   |
| 4. Has anyone from your family ever eaten a lot of food at once and then forced vomiting? How often? For how long?                                         |
| 5. Can you depend on your family in case of trouble? Describe such a situation.                                                                            |
| 6. Do your friends and family support you in maintaining your diet?                                                                                        |
| 7. Does your way of eating affect your life (selection of the job, place of work, friends, contacts with family)?                                          |
| 8. Do you feel lonely because people don't understand your lifestyle?                                                                                      |
| 9. Do you talk with other people about healthy diet? How often?                                                                                            |
| 10. What is your opinion about the people who do not pay attention to the quality of the food they consume?                                                |
| <b>Current diet</b>                                                                                                                                        |
| 1. Describe your current diet. What do you eat? How often? What products do you avoid? For how long have you been following your current diet?             |
| 2. Describe your process of planning and preparing your food. What do you think of while doing this? How does it make you feel?                            |

|                                                                                                                                               |
|-----------------------------------------------------------------------------------------------------------------------------------------------|
| 3. Where do you buy your food?                                                                                                                |
| 4. Before buying a product, do you check                                                                                                      |
| 1. for preservatives?                                                                                                                         |
| 2. for artificial food coloring?                                                                                                              |
| 3. country of origin?                                                                                                                         |
| 4. bio/organic/eco certificates?                                                                                                              |
| 5. amounts of sugars, sodium, fats, vitamins, and proteins?                                                                                   |
| 5. What is important for you when choosing food (taste, price, ingredients, appearance)?                                                      |
| 6. Do you often find yourself not being able to stop thinking about the quality of the food you eat? How often? Does it bother you? How much? |
| 7. Does maintaining your current diet make you feel more in control of yourself, your body, and your life?                                    |
| <b>Current health</b>                                                                                                                         |
| 1. Has your condition changed after starting the diet (for better or worse)?                                                                  |
| 2. How would you rate your health right now?                                                                                                  |
| 3. Do you have symptoms of such diseases as: diabetes, reflux, stomach ulcers, lactose intolerance, celiac disease, allergy?                  |
| 4. Have you recently blacked out, fainted, lost consciousness? When? How often does it happen? How many times did it happen in the last year? |
| 5. What is health for you? Where would you put your health on your priority list?                                                             |
| 6. What makes you happy? What determines your wellbeing?                                                                                      |
| 7. What is healthy food for you?                                                                                                              |

**Table S2.** Samples in the study

| Sample | Form of survey | Recruiting method                                                   | <i>n</i> | <i>n</i> (%) of Women | <i>M</i> <sub>Age</sub> | <i>SD</i> <sub>Age</sub> | TON-40 | ORTO-15 | EAT-26 | DEAS | HBI | WHOQOL | GSRH | OCIR | GAD-7 | PHQ-9 |
|--------|----------------|---------------------------------------------------------------------|----------|-----------------------|-------------------------|--------------------------|--------|---------|--------|------|-----|--------|------|------|-------|-------|
| 1      | On-line        | Snowball: mailing list, Facebook                                    | 182      | 77(42%)               | 27.04                   | 8.24                     | *      | *       | *      |      |     |        | *    | *    | *     |       |
| 2      | Paper-pencil   | Snowball: occasional meetings                                       | 157      | 95(61%)               | 31.99                   | 13.79                    | *      |         | *      | *    | *   |        | *    | *    | *     |       |
| 3      | Paper-pencil   | Psychology students at University                                   | 133      | 111(83%)              | 20.75                   | 1.27                     | *      |         |        | *    |     | *      | *    |      | *     | *     |
| 4      | Paper-pencil   | Health care staff from hospital and soldiers from one military unit | 82       | 33(40%)               | 33.39                   | 10.71                    | *      |         |        | *    |     | *      |      |      | *     |       |
| 5      | Paper-pencil   | Students at university                                              | 121      | 121(100%)             | 24.06                   | 4.97                     | *      |         |        | *    |     | *      | *    |      |       |       |
| 6      | Paper-pencil   | Physical activity students                                          | 92       | 0(0%)                 | 21.10                   | 2.05                     | *      |         |        |      |     |        | *    |      | *     | *     |

**Table S3.** Reliability and item analysis of the TON-40

| Item No. | Statistics if the item deleted |                       |           |          | Item-Total |
|----------|--------------------------------|-----------------------|-----------|----------|------------|
|          | <i>M</i>                       | <i>S</i> <sup>2</sup> | <i>SD</i> | $\alpha$ | <i>r</i>   |
| 1.       | 87.92                          | 628.66                | 25.07     | 0.932    | 0.41       |
| 2.       | 88.97                          | 632.82                | 25.16     | 0.931    | 0.45       |
| 3.       | 87.48                          | 632.80                | 25.16     | 0.931    | 0.43       |
| 4.       | 88.81                          | 629.19                | 25.08     | 0.931    | 0.45       |
| 5.       | 87.96                          | 630.30                | 25.11     | 0.931    | 0.47       |
| 6.       | 89.08                          | 638.46                | 25.27     | 0.932    | 0.40       |
| 7.       | 88.59                          | 629.34                | 25.09     | 0.931    | 0.49       |
| 8.       | 87.72                          | 642.39                | 25.35     | 0.933    | 0.24       |
| 9.       | 88.76                          | 633.47                | 25.17     | 0.931    | 0.45       |
| 10.      | 88.44                          | 623.25                | 24.96     | 0.930    | 0.59       |
| 11.      | 89.07                          | 627.13                | 25.04     | 0.930    | 0.58       |
| 12.      | 88.68                          | 623.39                | 24.97     | 0.930    | 0.63       |
| 13.      | 88.18                          | 631.41                | 25.13     | 0.931    | 0.47       |
| 14.      | 89.14                          | 629.49                | 25.09     | 0.930    | 0.56       |
| 15.      | 88.82                          | 630.19                | 25.10     | 0.931    | 0.52       |
| 16.      | 89.03                          | 631.27                | 25.13     | 0.931    | 0.45       |
| 17.      | 88.20                          | 633.16                | 25.16     | 0.932    | 0.39       |
| 18.      | 88.86                          | 629.35                | 25.09     | 0.930    | 0.53       |
| 19.      | 89.01                          | 629.31                | 25.09     | 0.930    | 0.55       |
| 20.      | 88.41                          | 626.05                | 25.02     | 0.931    | 0.49       |
| 21.      | 89.05                          | 622.30                | 24.95     | 0.929    | 0.68       |
| 22.      | 89.54                          | 634.52                | 25.19     | 0.930    | 0.58       |
| 23.      | 89.05                          | 626.73                | 25.03     | 0.930    | 0.55       |
| 24.      | 89.20                          | 612.68                | 24.75     | 0.934    | 0.39       |
| 25.      | 89.07                          | 631.52                | 25.13     | 0.931    | 0.47       |
| 26.      | 89.41                          | 633.31                | 25.17     | 0.930    | 0.54       |
| 27.      | 88.45                          | 627.31                | 25.05     | 0.931    | 0.49       |
| 28.      | 88.46                          | 629.98                | 25.10     | 0.931    | 0.43       |
| 29.      | 89.23                          | 637.30                | 25.24     | 0.932    | 0.39       |
| 30.      | 89.01                          | 618.04                | 24.86     | 0.929    | 0.73       |
| 31.      | 88.97                          | 622.29                | 24.95     | 0.929    | 0.66       |
| 32.      | 89.54                          | 633.01                | 25.16     | 0.930    | 0.60       |
| 33.      | 88.04                          | 634.10                | 25.18     | 0.932    | 0.36       |
| 34.      | 88.68                          | 624.92                | 25.00     | 0.930    | 0.60       |
| 35.      | 88.82                          | 623.71                | 24.97     | 0.930    | 0.61       |
| 36.      | 89.37                          | 630.99                | 25.12     | 0.930    | 0.59       |
| 37.      | 89.27                          | 630.04                | 25.10     | 0.930    | 0.57       |
| 38.      | 88.96                          | 633.25                | 25.16     | 0.932    | 0.40       |
| 39.      | 89.16                          | 637.17                | 25.24     | 0.932    | 0.38       |
| 40.      | 89.06                          | 625.61                | 25.01     | 0.930    | 0.61       |

**Table S4.** Test–re-test reliability ( $n = 126$ ).

| Item of<br>TON-40 | <i>M</i> | <i>SD</i> | <i>M</i> | <i>SD</i> | Cohen's Kappa | Pearson's<br><i>r</i> | Spearman's <i>r</i> |
|-------------------|----------|-----------|----------|-----------|---------------|-----------------------|---------------------|
| 1.                | 4.16     | 0.89      | 3.83     | 0.98      | 0.40          | 0.60                  | 0.63                |
| 2.                | 2.48     | 1.06      | 2.48     | 1.03      | 0.48          | 0.71                  | 0.69                |
| 3.                | 3.56     | 1.13      | 3.13     | 1.16      | 0.21          | 0.59                  | 0.58                |
| 4.                | 3.02     | 1.29      | 2.83     | 1.29      | 0.39          | 0.72                  | 0.72                |
| 5.                | 3.25     | 1.25      | 2.94     | 1.25      | 0.41          | 0.74                  | 0.73                |
| 6.                | 2.20     | 1.14      | 2.21     | 1.13      | 0.23          | 0.43                  | 0.45                |
| 7.                | 2.05     | 0.95      | 1.94     | 0.91      | 0.30          | 0.53                  | 0.54                |
| 8.                | 3.67     | 0.99      | 3.76     | 1.08      | 0.36          | 0.60                  | 0.63                |
| 9.                | 2.02     | 0.98      | 1.81     | 0.97      | 0.32          | 0.57                  | 0.55                |
| 10.               | 2.79     | 1.17      | 2.58     | 1.20      | 0.35          | 0.60                  | 0.60                |
| 11.               | 1.52     | 0.78      | 1.43     | 0.65      | 0.32          | 0.38                  | 0.40                |
| 12.               | 2.17     | 0.92      | 2.00     | 0.95      | 0.36          | 0.51                  | 0.53                |
| 13.               | 2.94     | 1.12      | 2.79     | 1.11      | 0.28          | 0.60                  | 0.59                |
| 14.               | 1.94     | 1.02      | 1.83     | 0.86      | 0.32          | 0.41                  | 0.43                |
| 15.               | 1.80     | 0.95      | 1.73     | 0.97      | 0.34          | 0.45                  | 0.48                |
| 16.               | 2.52     | 1.13      | 2.36     | 1.26      | 0.37          | 0.55                  | 0.51                |
| 17.               | 3.73     | 1.05      | 3.20     | 1.18      | 0.21          | 0.55                  | 0.58                |
| 18.               | 2.33     | 1.11      | 2.38     | 1.06      | 0.41          | 0.62                  | 0.60                |
| 19.               | 1.84     | 0.93      | 1.70     | 0.88      | 0.40          | 0.63                  | 0.52                |
| 20.               | 1.94     | 1.03      | 1.89     | 1.02      | 0.29          | 0.64                  | 0.58                |
| 21.               | 2.04     | 1.01      | 2.03     | 1.03      | 0.33          | 0.48                  | 0.47                |
| 22.               | 1.43     | 0.79      | 1.48     | 0.92      | 0.21          | 0.30                  | 0.25                |
| 23.               | 2.28     | 1.40      | 2.33     | 1.32      | 0.39          | 0.61                  | 0.59                |
| 24.               | 1.47     | 0.77      | 1.46     | 0.73      | 0.40          | 0.48                  | 0.47                |
| 25.               | 1.21     | 0.59      | 1.33     | 0.74      | 0.26          | 0.37                  | 0.30                |
| 26.               | 1.21     | 0.64      | 1.29     | 0.67      | 0.23          | 0.21                  | 0.30                |
| 27.               | 2.14     | 1.15      | 2.30     | 1.19      | 0.33          | 0.57                  | 0.61                |
| 28.               | 1.85     | 1.00      | 1.79     | 0.95      | 0.29          | 0.60                  | 0.53                |
| 29.               | 1.90     | 1.26      | 1.85     | 1.21      | 0.26          | 0.63                  | 0.53                |
| 30.               | 2.06     | 1.09      | 2.10     | 1.14      | 0.39          | 0.64                  | 0.67                |
| 31.               | 1.97     | 1.02      | 1.91     | 0.92      | 0.33          | 0.55                  | 0.51                |
| 32.               | 1.34     | 0.62      | 1.40     | 0.71      | 0.28          | 0.45                  | 0.33                |
| 33.               | 2.39     | 1.11      | 2.22     | 1.09      | 0.32          | 0.58                  | 0.58                |
| 34.               | 2.36     | 1.11      | 2.26     | 1.12      | 0.36          | 0.65                  | 0.65                |
| 35.               | 2.29     | 1.08      | 2.19     | 1.01      | 0.36          | 0.61                  | 0.61                |
| 36.               | 1.65     | 0.96      | 1.70     | 0.90      | 0.43          | 0.63                  | 0.63                |
| 37.               | 1.85     | 1.10      | 1.83     | 0.96      | 0.39          | 0.62                  | 0.59                |
| 38.               | 2.42     | 1.55      | 2.44     | 1.46      | 0.35          | 0.67                  | 0.63                |
| 39.               | 1.57     | 0.92      | 1.74     | 0.96      | 0.45          | 0.56                  | 0.54                |
| 40.               | 1.69     | 0.93      | 1.81     | 1.00      | 0.28          | 0.63                  | 0.51                |
| <i>M</i>          | 2.23     | 1.02      | 2.16     | 1.02      | 0.34          | 0.56                  | 0.54                |

**Table S6.** Comparison of EFA 1, EFA2, and EFA 3 results.

[illegible]

|    |                                                                                                                                  |             |             |  |      |
|----|----------------------------------------------------------------------------------------------------------------------------------|-------------|-------------|--|------|
| 24 | I feel guilty when I eat something unhealthy.                                                                                    |             |             |  | 0.59 |
| 25 | The health value of a product is more important to me than its taste.                                                            | 0.70        |             |  | 0.72 |
| 26 | I keep my diet up to date for the sake of my health.                                                                             | 0.62        |             |  | 0.72 |
| 27 | Health is most important to me.                                                                                                  | <b>0.69</b> | <b>0.62</b> |  | 0.67 |
| 28 | Due to the current diet, my health deteriorated.                                                                                 | <b>0.57</b> | <b>0.58</b> |  | 0.46 |
| 29 | My relatives, doctors or other health care workers were concerned about my health condition and suggested that I change my diet. | <b>0.55</b> | <b>0.66</b> |  | 0.54 |
| 30 | I feel a constant need to look for healthy food products.                                                                        |             |             |  |      |
| 31 | Trying to restrict healthy foods in my diet causes me irritation, depression, or annoyance.                                      |             |             |  |      |
| 32 | I pushed my hobbies and interests to the background by engaging in a healthy lifestyle.                                          | 0.61        | 0.66        |  | 0.64 |
| 33 | My friends complain that I care too much about a healthy lifestyle.                                                              |             |             |  |      |
| 34 | Life without healthy food is empty and meaningless.                                                                              | 0.50        |             |  |      |
| 35 | It bothers me when someone gives me unhealthy food to eat.                                                                       |             |             |  |      |
| 36 | I prefer to eat a healthy meal alone than to go out with friends or family to eat something out.                                 | <b>0.58</b> | <b>0.58</b> |  | 0.48 |
| 37 | Food quality thoughts torment me most of the day.                                                                                | <b>0.60</b> | <b>0.57</b> |  | 0.51 |
| 38 | Eating healthy food significantly affects my quality of life.                                                                    | <b>0.61</b> | <b>0.65</b> |  | 0.61 |
| 39 | I exclude certain products from my diet (e.g. sugar, gluten, lactose), even though I am not allergic to them.                    |             | 0.57        |  | 0.41 |
| 40 | I don't eat meat, eggs or dairy products if they contain antibiotics or hormones.                                                | 0.47        |             |  |      |

---

**Table S7.** Inter-item correlations for TON-17 (Sample 3,  $n = 255$ ).

| Item | 1       | 2       | 3        | 4       | 5       | 6        | 7       | 8        | 9       | 10      | 11      | 12      | 13      | 14      | 15      | 16    | 17   |
|------|---------|---------|----------|---------|---------|----------|---------|----------|---------|---------|---------|---------|---------|---------|---------|-------|------|
| 1    | 1.00    |         |          |         |         |          |         |          |         |         |         |         |         |         |         |       |      |
| 2    | 0.32*** | 1.00    |          |         |         |          |         |          |         |         |         |         |         |         |         |       |      |
| 3    | 0.39*** | 0.05    | 1.00     |         |         |          |         |          |         |         |         |         |         |         |         |       |      |
| 4    | 0.28*** | 0.22*** | 0.46***  | 1.00    |         |          |         |          |         |         |         |         |         |         |         |       |      |
| 5    | 0.33*** | 0.06    | 0.41***  | 0.44*** | 1.00    |          |         |          |         |         |         |         |         |         |         |       |      |
| 6    | 0.33*** | -0.05   | 0.51***  | 0.35*** | 0.55*** | 1.00     |         |          |         |         |         |         |         |         |         |       |      |
| 7    | 0.22*** | 0.52*** | 0.04     | 0.14*   | 0.13*   | -0.04    | 1.00    |          |         |         |         |         |         |         |         |       |      |
| 8    | 0.39*** | 0.09    | 0.48***  | 0.41*** | 0.31*** | 0.44***  | 0.11    | 1.00     |         |         |         |         |         |         |         |       |      |
| 9    | 0.11    | 0.52*** | -0.19**  | 0.03    | -0.01   | -0.24*** | 0.45*** | -0.12    | 1.00    |         |         |         |         |         |         |       |      |
| 10   | 0.14*   | 0.15*   | 0.19**   | 0.21**  | 0.23*** | 0.17**   | 0.38*** | 0.22***  | 0.16*   | 1.00    |         |         |         |         |         |       |      |
| 11   | -0.10   | 0.39*** | -0.36*** | -0.15*  | -0.12   | -0.34*** | 0.40*** | -0.27*** | 0.60*** | 0.03    | 1.00    |         |         |         |         |       |      |
| 12   | 0.08    | 0.14*   | 0.06     | 0.10    | 0.08    | -0.04    | 0.11    | 0.06***  | 0.18**  | 0.29*** | 0.13*   | 1.00    |         |         |         |       |      |
| 13   | 0.04    | 0.02    | 0.17**   | 0.13*   | 0.03    | 0.06     | 0.03    | 0.14*    | 0.07    | 0.32*** | -0.11   | 0.40*** | 1.00    |         |         |       |      |
| 14   | 0.09    | 0.19**  | 0.19**   | 0.10    | 0.09    | 0.10     | 0.40*** | 0.21**   | 0.16*   | 0.49*** | 0.06    | 0.30*** | 0.27*** | 1.00    |         |       |      |
| 15   | 0.16*   | 0.18    | 0.21**   | 0.22*** | 0.23*** | 0.12     | 0.24*** | 0.27***  | 0.17**  | 0.34*** | 0.05    | 0.15*   | 0.25*** | 0.42*** | 1.00    |       |      |
| 16   | 0.26*** | 0.20**  | 0.21**   | 0.25*** | 0.17**  | 0.10     | 0.25*** | 0.28***  | 0.18**  | 0.33*** | 0.00    | 0.30*** | 0.26*** | 0.40*** | 0.36*** | 1.00  |      |
| 17   | 0.14*   | 0.40*** | -0.10    | 0.11    | 0.09    | -0.19**  | 0.39*** | -0.06    | 0.52*** | 0.11    | 0.46*** | 0.20**  | -0.02   | 0.16*   | 0.20**  | 0.15* | 1.00 |

\* $p < 0.05$ , \*\* $p < 0.01$ , \*\*\* $p < 0.001$



**Table S8.** Reliability and item analysis of the TON-17 (Sample 3,  $n = 255$ )

| Item No. | Statistics if the item deleted |       |      |          | Item-Total |
|----------|--------------------------------|-------|------|----------|------------|
|          | $M$                            | $S^2$ | $SD$ | $\alpha$ | $r$        |
| 1.       | 38.01                          | 80.14 | 8.95 | 0.76     | 0.43       |
| 2.       | 38.49                          | 79.43 | 8.91 | 0.76     | 0.47       |
| 3.       | 39.08                          | 81.23 | 9.01 | 0.77     | 0.34       |
| 4.       | 39.14                          | 80.17 | 8.95 | 0.76     | 0.44       |
| 5.       | 39.06                          | 80.71 | 8.98 | 0.76     | 0.40       |
| 6.       | 38.57                          | 83.83 | 9.16 | 0.78     | 0.22       |
| 7.       | 39.25                          | 79.10 | 8.89 | 0.75     | 0.50       |
| 8.       | 38.89                          | 80.42 | 8.97 | 0.76     | 0.37       |
| 9.       | 38.68                          | 80.94 | 9.00 | 0.77     | 0.34       |
| 10.      | 40.04                          | 83.19 | 9.12 | 0.76     | 0.48       |
| 11.      | 38.20                          | 87.05 | 9.33 | 0.79     | 0.09       |
| 12.      | 39.52                          | 83.93 | 9.16 | 0.77     | 0.32       |
| 13.      | 39.66                          | 84.65 | 9.20 | 0.77     | 0.23       |
| 14.      | 40.00                          | 82.91 | 9.11 | 0.76     | 0.45       |
| 15.      | 39.89                          | 82.58 | 9.09 | 0.76     | 0.45       |
| 16.      | 39.66                          | 81.04 | 9.00 | 0.76     | 0.47       |
| 17.      | 38.31                          | 80.07 | 8.95 | 0.77     | 0.34       |
