# Supplementary material for: Development and Validation of the Test of Orthorexia Nervosa (TON-17)
Source: J Clin Med. 2021 Apr 12;10(8):1637. doi: 10.3390/jcm10081637 (PMC8069172; doi:10.3390/jcm10081637)
Supplement: Supplementary file 1 [file jcm-10-01637-s001.zip]

Archive with 5 entries (4 files):
- Supplementary Materials/
- Supplementary Materials/Supplementary Materials_Tables_S1-S8.pdf
- Supplementary Materials/Supplementary Materials_TON-17_EN.pdf
- Supplementary Materials/Supplementary Materials_TON-17_PL.pdf
- Supplementary Materials/Table_S5-Supplementary Materials.xlsx
