# Supplementary material for: Development and Validation of the Test of Orthorexia Nervosa (TON-17)
Source: J Clin Med. 2021 Apr 12;10(8):1637. doi: 10.3390/jcm10081637 (PMC8069172; doi:10.3390/jcm10081637)
Supplement: Supplementary file 1 [file jcm-10-01637-s001.zip › Supplementary Materials/Table_S5-Supplementary Materials.xlsx]

## Sheet: Sample 1
Table S5a. Inter-item correlations for TON-40 (Sample 1, n = 256)
	1	2	3	4	5	6	7	8	9	10	11	12	13	14	15	16	17	18	19	20	21	22	23	24	25	26	27	28	29	30	31	32	33	34	35	36	37	38	39	40
1	1***
2	0.26***	1***
3	0.38***	0.13*	1***
4	0.24***	0.22***	0.51***	1***
5	0.35***	0.19**	0.45***	0.47***	1***
6	0.09	0.17**	0.22***	0.33***	0.21***	1***
7	0.28***	0.51***	0.19**	0.26***	0.38***	0.31***	1***
8	0.37***	0.12	0.42***	0.42***	0.57***	0.10	0.29***	1***
9	0.30***	0.38***	0.24***	0.32***	0.37***	0.30***	0.51***	0.33***	1***
10	0.21***	0.36***	0.22***	0.18**	0.32***	0.13*	0.41***	0.19**	0.37***	1***
11	0.07	0.33***	0.07	0.12*	0.10	0.27***	0.42***	-0.04	0.39***	0.37***	1***
12	0.23***	0.21***	0.34***	0.3***	0.29***	0.20**	0.24***	0.36***	0.36***	0.28***	0.21***	1***
13	0.20**	0.08	0.52***	0.46***	0.52***	0.10	0.17**	0.54***	0.22***	0.26***	0.10	0.42***	1***
14	0.17**	0.14*	0.38***	0.29***	0.36***	0.26***	0.25***	0.31***	0.35***	0.31***	0.26***	0.46***	0.51***	1***
15	0.14*	0.17**	0.14*	0.26***	0.26***	0.20**	0.21***	0.21***	0.29***	0.25***	0.24***	0.34***	0.27***	0.43***	1***
16	0.21***	0.12	0.36***	0.33***	0.42***	0.26***	0.23***	0.36***	0.22***	0.20**	0.11	0.37***	0.48***	0.41***	0.33***	1***
17	0.33***	0.10	0.50***	0.43***	0.46***	0.23***	0.19**	0.46***	0.24***	0.30***	0.04	0.31***	0.51***	0.30***	0.28***	0.43***	1***
18	0.31***	0.34***	0.30***	0.36***	0.44***	0.18**	0.45***	0.33***	0.44***	0.38***	0.31***	0.34***	0.37***	0.38***	0.32***	0.34***	0.31***	1***
19	0.06	0.31***	-0.14*	-0.04	0.01	0.10	0.37***	-0.23***	0.34***	0.26***	0.36***	0.04	-0.20**	0.04	0.15*	-0.02	-0.12	0.33***	1***
20	0.22***	0.27***	0.24***	0.27***	0.33***	0.19**	0.44***	0.3***	0.36***	0.33***	0.31***	0.33***	0.21***	0.27***	0.25***	0.32***	0.45***	0.42***	0.32***	1***
21	0.19**	0.08	0.40***	0.46***	0.42***	0.19**	0.21***	0.37***	0.33***	0.26***	0.17**	0.38***	0.51***	0.51***	0.38***	0.32***	0.47***	0.35***	-0.01	0.40***	1***
22	0.15*	0.21***	0.22***	0.25***	0.28***	0.22***	0.14*	0.15*	0.18**	0.18**	0.18**	0.35***	0.31***	0.42***	0.44***	0.45***	0.2**	0.23***	0.15*	0.28***	0.34***	1***
23	0.19**	0.12	0.33***	0.16*	0.44***	0.02	0.14*	0.27***	0.18**	0.28***	0.05	0.38***	0.45***	0.39***	0.27***	0.36***	0.35***	0.28***	0.02	0.28***	0.32***	0.35***	1***
24	0.20**	0.29***	-0.05	< 0.01	0.05	0.16*	0.35***	-0.09	0.23***	0.21***	0.32***	0.15*	-0.01	0.17**	0.20**	0.06	-0.03	0.24***	0.48***	0.31***	0.14*	0.37***	0.10	1***
25	0.11	0.37***	-0.05	-0.01	0.01	0.29***	0.43***	-0.12	0.27***	0.21***	0.45***	0.08	-0.13*	0.17**	0.21***	0.15*	-0.06	0.28***	0.48***	0.28***	-0.01	0.34***	< 0.01	0.47***	1***
26	0.07	0.35***	-0.06	-0.02	< 0.01	0.21***	0.40***	-0.12	0.31***	0.22***	0.41***	0.16*	-0.10	0.21***	0.20**	0.16*	-0.09	0.21***	0.40***	0.20**	0.07	0.36***	0.05	0.46***	0.54***	1***
27	0.05	0.37***	-0.18**	-0.13*	-0.07	0.10	0.38***	-0.22***	0.29***	0.24***	0.38***	0.04	-0.20**	0.07	0.15*	-0.02	-0.15*	0.21***	0.56***	0.16**	-0.06	0.13*	0.01	0.34***	0.54***	0.51***	1***
28	0.02	0.14*	0.03	0.11	0.14*	0.14*	0.10	0.01	0.24***	0.25***	0.16*	0.17**	0.16**	0.30***	0.40***	0.15*	0.11	0.15*	0.28***	0.17**	0.23***	0.41***	0.36***	0.21***	0.19**	0.24***	0.16*	1***
29	0.06	-0.03	0.19**	0.19**	0.19**	0.26***	0.06	0.13*	0.17**	0.08	0.09	0.20***	0.19**	0.26***	0.28***	0.21***	0.24***	0.12	0.09	0.20**	0.24***	0.33***	0.41***	0.16*	0.13*	0.15*	-0.05	0.42***	1***
30	0.29***	0.32***	0.32***	0.28***	0.42***	0.29***	0.43***	0.32***	0.41***	0.40***	0.28***	0.31***	0.31***	0.36***	0.3***	0.36***	0.44***	0.44***	0.27***	0.51***	0.46***	0.37***	0.34***	0.29***	0.3***	0.32***	0.22***	0.32***	0.34***	1***
31	0.26***	0.22***	0.32***	0.31***	0.39***	0.16*	0.31***	0.24***	0.27***	0.33***	0.21***	0.34***	0.38***	0.33***	0.3***	0.38***	0.4***	0.35***	0.24***	0.47***	0.37***	0.41***	0.41***	0.29***	0.21***	0.20**	0.10	0.35***	0.31***	0.49***	1***
32	0.19**	0.22***	0.31***	0.26***	0.29***	0.23***	0.28***	0.21***	0.22***	0.22***	0.27***	0.33***	0.32***	0.44***	0.44***	0.43***	0.25***	0.27***	0.13*	0.4***	0.42***	0.56***	0.27***	0.29***	0.33***	0.29***	0.07	0.37***	0.36***	0.46***	0.49***	1***
33	0.23***	0.13*	0.37***	0.30***	0.43***	0.15*	0.27***	0.39***	0.28***	0.33***	0.13*	0.46***	0.54***	0.51***	0.36***	0.49***	0.43***	0.33***	-0.01	0.34***	0.41***	0.36***	0.47***	0.13*	0.09	0.14*	0.04	0.26***	0.26***	0.35***	0.53***	0.42***	1***
34	0.23***	0.16*	0.34***	0.32***	0.44***	0.18**	0.31***	0.31***	0.34***	0.40***	0.23***	0.37***	0.44***	0.44***	0.36***	0.48***	0.47***	0.47***	0.23***	0.45***	0.47***	0.39***	0.34***	0.21***	0.23***	0.21***	0.18**	0.22***	0.26***	0.5***	0.52***	0.48***	0.55***	1***
35	0.30***	0.25***	0.28***	0.3***	0.39***	0.17**	0.31***	0.32***	0.28***	0.29***	0.24***	0.35***	0.40***	0.41***	0.3***	0.36***	0.37***	0.38***	0.18**	0.47***	0.42***	0.43***	0.28***	0.36***	0.2**	0.34***	0.14*	0.23***	0.26***	0.53***	0.44***	0.5***	0.48***	0.49***	1***
36	0.15*	0.24***	0.26***	0.27***	0.33***	0.26***	0.21***	0.23***	0.34***	0.28***	0.25***	0.33***	0.28***	0.43***	0.38***	0.32***	0.31***	0.35***	0.22***	0.42***	0.39***	0.48***	0.29***	0.29***	0.32***	0.26***	0.14*	0.41***	0.32***	0.52***	0.39***	0.55***	0.34***	0.45***	0.49***	1***
37	0.14*	0.17**	0.24***	0.24***	0.35***	0.26***	0.23***	0.16*	0.30***	0.20**	0.19**	0.24***	0.25***	0.34***	0.32***	0.32***	0.27***	0.36***	0.26***	0.42***	0.41***	0.49***	0.43***	0.33***	0.2**	0.27***	0.18**	0.39***	0.37***	0.43***	0.44***	0.46***	0.41***	0.46***	0.48***	0.55***	1***
38	0.14*	0.34***	-0.01	0.07	0.22***	0.14*	0.41***	-0.01	0.32***	0.36***	0.31***	0.03	0.04	0.12	0.20**	0.21***	0.11	0.32***	0.49***	0.29***	0.04	0.25***	0.14*	0.33***	0.53***	0.46***	0.43***	0.25***	0.15*	0.42***	0.35***	0.20**	0.23***	0.33***	0.29***	0.32***	0.31***	1***
39	0.09	0.18**	0.03	0.07	0.13*	0.27***	0.25***	0.06	0.25***	0.13*	0.18**	0.13*	0.01	0.14*	0.14*	0.09	0.12	0.25***	0.28***	0.31***	0.15*	0.30***	0.11	0.35***	0.38***	0.30***	0.15*	0.14*	0.37***	0.30***	0.25***	0.23***	0.08	0.19**	0.30***	0.37***	0.35***	0.32***	1***
40	0.23***	0.38***	0.19**	0.17**	0.26***	0.18**	0.39***	0.23***	0.40***	0.33***	0.21***	0.29***	0.14*	0.25***	0.17**	0.24***	0.18**	0.31***	0.29***	0.43***	0.27***	0.33***	0.10	0.28***	0.30***	0.32***	0.27***	0.10	0.15*	0.48***	0.37***	0.29***	0.23***	0.34***	0.44***	0.35***	0.32***	0.31***	0.41***	1***

## Sheet: Sample 2
Table S5b. Inter-item correlations for TON-40 (Sample 2, n = 256)
	1	2	3	4	5	6	7	8	9	10	11	12	13	14	15	16	17	18	19	20	21	22	23	24	25	26	27	28	29	30	31	32	33	34	35	36	37	38	39	40
1	1***
2	0.28***	1***
3	0.43***	0.14*	1***
4	0.44***	0.28***	0.50***	1***
5	0.47***	0.13*	0.54***	0.43***	1***
6	0.23***	0.27***	0.24***	0.41***	0.17**	1***
7	0.33***	0.56***	0.23***	0.34***	0.31***	0.38***	1***
8	0.39***	0.11	0.47***	0.42***	0.55***	0.22***	0.23***	1***
9	0.41***	0.44***	0.41***	0.42***	0.36***	0.39***	0.50***	0.32***	1***
10	0.27***	0.36***	0.33***	0.36***	0.36***	0.21***	0.39***	0.27***	0.34***	1***
11	0.24***	0.48***	0.10	0.21***	0.11	0.32***	0.49***	0.09	0.48***	0.42***	1***
12	0.21***	0.10	0.41***	0.33***	0.33***	0.24***	0.28***	0.33***	0.41***	0.31***	0.21***	1***
13	0.32***	-0.01	0.53***	0.44***	0.53***	0.23***	0.12*	0.45***	0.24***	0.25***	0.10	0.39***	1***
14	0.18**	0.19**	0.35***	0.38***	0.33***	0.26***	0.30***	0.34***	0.38***	0.32***	0.22***	0.43***	0.55***	1***
15	0.20**	0.27***	0.23***	0.26***	0.25***	0.3***	0.40***	0.21***	0.44***	0.26***	0.41***	0.36***	0.28***	0.42***	1***
16	0.36***	0.15*	0.35***	0.45***	0.38***	0.33***	0.29***	0.42***	0.4***	0.29***	0.31***	0.36***	0.44***	0.46***	0.35***	1***
17	0.37***	0.22***	0.44***	0.51***	0.39***	0.42***	0.23***	0.51***	0.27***	0.34***	0.17**	0.36***	0.55***	0.44***	0.28***	0.51***	1***
18	0.35***	0.33***	0.27***	0.33***	0.28***	0.22***	0.42***	0.31***	0.43***	0.29***	0.35***	0.18**	0.27***	0.37***	0.34***	0.40***	0.34***	1***
19	0.21***	0.45***	-0.03	0.11	0.07	0.21***	0.49***	-0.13*	0.42***	0.2**	0.46***	0.09	-0.16*	0.12	0.29***	0.13*	-0.07	0.40***	1***
20	0.32***	0.31***	0.25***	0.29***	0.30***	0.32***	0.37***	0.26***	0.50***	0.31***	0.46***	0.28***	0.32***	0.36***	0.31***	0.35***	0.44***	0.44***	0.33***	1***
21	0.22***	0.09	0.45***	0.45***	0.44***	0.26***	0.22***	0.33***	0.38***	0.30***	0.24***	0.47***	0.6***	0.4***	0.33***	0.43***	0.38***	0.30***	0.03	0.39***	1***
22	0.22***	0.15*	0.27***	0.28***	0.18**	0.31***	0.29***	0.20**	0.36***	0.17**	0.29***	0.41***	0.39***	0.53***	0.49***	0.42***	0.32***	0.23***	0.16*	0.32***	0.39***	1***
23	0.28***	0.02	0.36***	0.26***	0.34***	0.07	0.19**	0.24***	0.15*	0.25***	0.03	0.39***	0.40***	0.31***	0.24***	0.27***	0.33***	0.22***	0.01	0.32***	0.37***	0.29***	1***
24	0.21***	0.39***	< 0.01	0.19**	0.03	0.30***	0.46***	-0.08	0.39***	0.15*	0.48***	0.12	0.01	0.22***	0.39***	0.25***	0.10	0.34***	0.58***	0.37***	0.13*	0.34***	0.10	1***
25	0.03	0.37***	-0.10	0.13*	-0.09	0.36***	0.41***	-0.16**	0.35***	0.17**	0.46***	0.18**	-0.10	0.19**	0.31***	0.20**	0.10	0.26***	0.52***	0.29***	0.10	0.35***	-0.01	0.61***	1***
26	0.10	0.33***	-0.08	0.16**	-0.02	0.29***	0.39***	-0.05	0.35***	0.15*	0.45***	0.24***	-0.02	0.22***	0.29***	0.18**	0.04	0.25***	0.45***	0.29***	0.13*	0.32***	0.01	0.51***	0.49***	1***
27	0.06	0.35***	-0.14*	-0.01	-0.12	0.21***	0.38***	-0.22***	0.27***	0.14*	0.29***	0.02	-0.31***	0.04	0.19**	< 0.01	-0.12	0.22***	0.54***	0.15*	-0.11	0.09	-0.01	0.41***	0.46***	0.34***	1***
28	0.14*	0.09	0.10	0.24***	0.07	0.17**	0.16*	0.05	0.28***	0.10	0.19**	0.27***	0.19**	0.24***	0.31***	0.23***	0.11	0.28***	0.26***	0.21***	0.33***	0.45***	0.31***	0.42***	0.35***	0.29***	0.16*	1***
29	0.12	0.08	0.23***	0.21***	0.16**	0.32***	0.25***	0.15*	0.33***	0.17**	0.21***	0.45***	0.33***	0.38***	0.36***	0.28***	0.18**	0.12	0.17**	0.21***	0.44***	0.48***	0.28***	0.29***	0.23***	0.35***	0.09	0.41***	1***
30	0.36***	0.34***	0.25***	0.39***	0.31***	0.39***	0.50***	0.37***	0.48***	0.40***	0.46***	0.35***	0.35***	0.45***	0.46***	0.42***	0.48***	0.39***	0.28***	0.52***	0.39***	0.42***	0.29***	0.45***	0.41***	0.45***	0.22***	0.29***	0.40***	1***
31	0.28***	0.33***	0.29***	0.31***	0.27***	0.29***	0.36***	0.30***	0.45***	0.30***	0.39***	0.45***	0.40***	0.47***	0.47***	0.38***	0.39***	0.42***	0.33***	0.46***	0.43***	0.6***	0.3***	0.42***	0.39***	0.34***	0.16**	0.45***	0.50***	0.52***	1***
32	0.11	0.19**	0.20***	0.31***	0.22***	0.36***	0.29***	0.22***	0.40***	0.25***	0.39***	0.39***	0.35***	0.47***	0.44***	0.40***	0.29***	0.35***	0.23***	0.48***	0.52***	0.55***	0.27***	0.35***	0.37***	0.35***	0.10	0.45***	0.54***	0.48***	0.55***	1***
33	0.26***	0.08	0.39***	0.31***	0.31***	0.31***	0.25***	0.38***	0.35***	0.31***	0.15*	0.42***	0.46***	0.51***	0.3***	0.41***	0.50***	0.26***	-0.04	0.29***	0.47***	0.52***	0.38***	0.17**	0.08	0.10	0.09	0.30***	0.36***	0.36***	0.46***	0.38***	1***
34	0.39***	0.25***	0.26***	0.37***	0.20**	0.37***	0.31***	0.22***	0.28***	0.23***	0.27***	0.30***	0.29***	0.30***	0.33***	0.41***	0.49***	0.41***	0.20**	0.32***	0.34***	0.39***	0.32***	0.28***	0.25***	0.16**	0.05	0.30***	0.27***	0.33***	0.43***	0.34***	0.40***	1***
35	0.41***	0.28***	0.35***	0.38***	0.30***	0.35***	0.42***	0.35***	0.45***	0.30***	0.39***	0.39***	0.40***	0.48***	0.39***	0.51***	0.45***	0.42***	0.33***	0.47***	0.41***	0.49***	0.30***	0.42***	0.35***	0.30***	0.19**	0.3***	0.40***	0.51***	0.59***	0.49***	0.47***	0.52***	1***
36	0.24***	0.23***	0.33***	0.34***	0.19**	0.26***	0.30***	0.18**	0.40***	0.20**	0.25***	0.39***	0.29***	0.34***	0.35***	0.41***	0.29***	0.38***	0.35***	0.33***	0.39***	0.5***	0.31***	0.37***	0.31***	0.30***	0.18**	0.41***	0.48***	0.38***	0.52***	0.42***	0.37***	0.49***	0.60***	1***
37	0.22***	0.24***	0.32***	0.33***	0.21***	0.32***	0.29***	0.15*	0.39***	0.16*	0.27***	0.26***	0.28***	0.38***	0.41***	0.37***	0.32***	0.36***	0.32***	0.40***	0.37***	0.48***	0.34***	0.45***	0.35***	0.22***	0.16**	0.45***	0.43***	0.41***	0.48***	0.53***	0.34***	0.41***	0.46***	0.62***	1***
38	0.15*	0.43***	-0.09	0.08	-0.01	0.28***	0.41***	-0.08	0.28***	0.18**	0.42***	0.10	-0.11	0.16*	0.21***	0.14*	0.07	0.29***	0.52***	0.20**	-0.04	0.18**	-0.04	0.48***	0.48***	0.45***	0.45***	0.21***	0.14*	0.31***	0.35***	0.26***	0.15*	0.25***	0.29***	0.25***	0.32***	1***
39	0.20**	0.29***	0.07	0.17**	0.05	0.47***	0.43***	0.05	0.42***	0.12*	0.39***	0.22***	0.05	0.22***	0.37***	0.20**	0.14*	0.32***	0.43***	0.34***	0.09	0.26***	0.04	0.49***	0.43***	0.41***	0.34***	0.14*	0.33***	0.42***	0.33***	0.32***	0.15*	0.23***	0.40***	0.37***	0.31***	0.37***	1***
40	0.23***	0.24***	0.16*	0.20**	0.21***	0.20**	0.37***	0.23***	0.37***	0.15*	0.35***	0.25***	0.20***	0.30***	0.30***	0.21***	0.16*	0.32***	0.34***	0.39***	0.28***	0.38***	0.10	0.36***	0.29***	0.38***	0.18**	0.23***	0.27***	0.39***	0.40***	0.42***	0.20**	0.21***	0.37***	0.29***	0.35***	0.27***	0.37***	1***
